# Supplementary material for: The metabolic/pH sensor soluble adenylyl cyclase is a tumor suppressor protein
Source: PubMed Central journal article supplement (PMC5216745; doi:10.18632/oncotarget.10056), 2016-06-15
Supplement: oncotarget-07-45597-s001.pdf [file oncotarget-07-45597-s001.pdf]

# The metabolic/pH sensor soluble adenylyl cyclase is a tumor suppressor protein

## Supplementary Materials

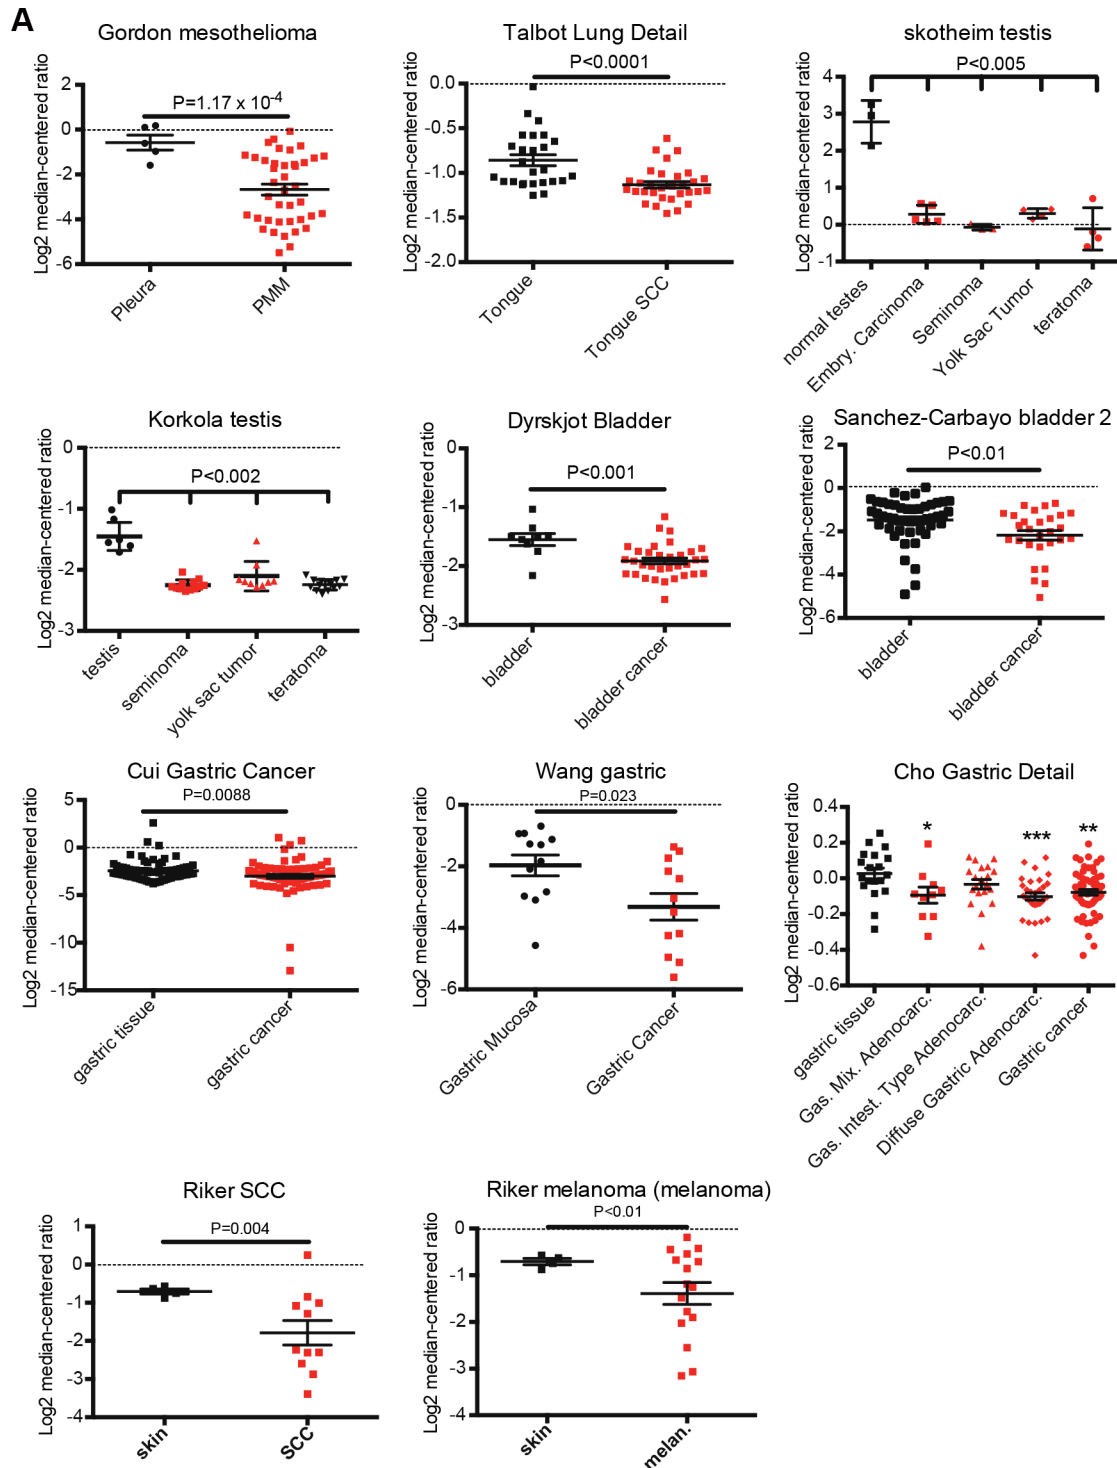

**B**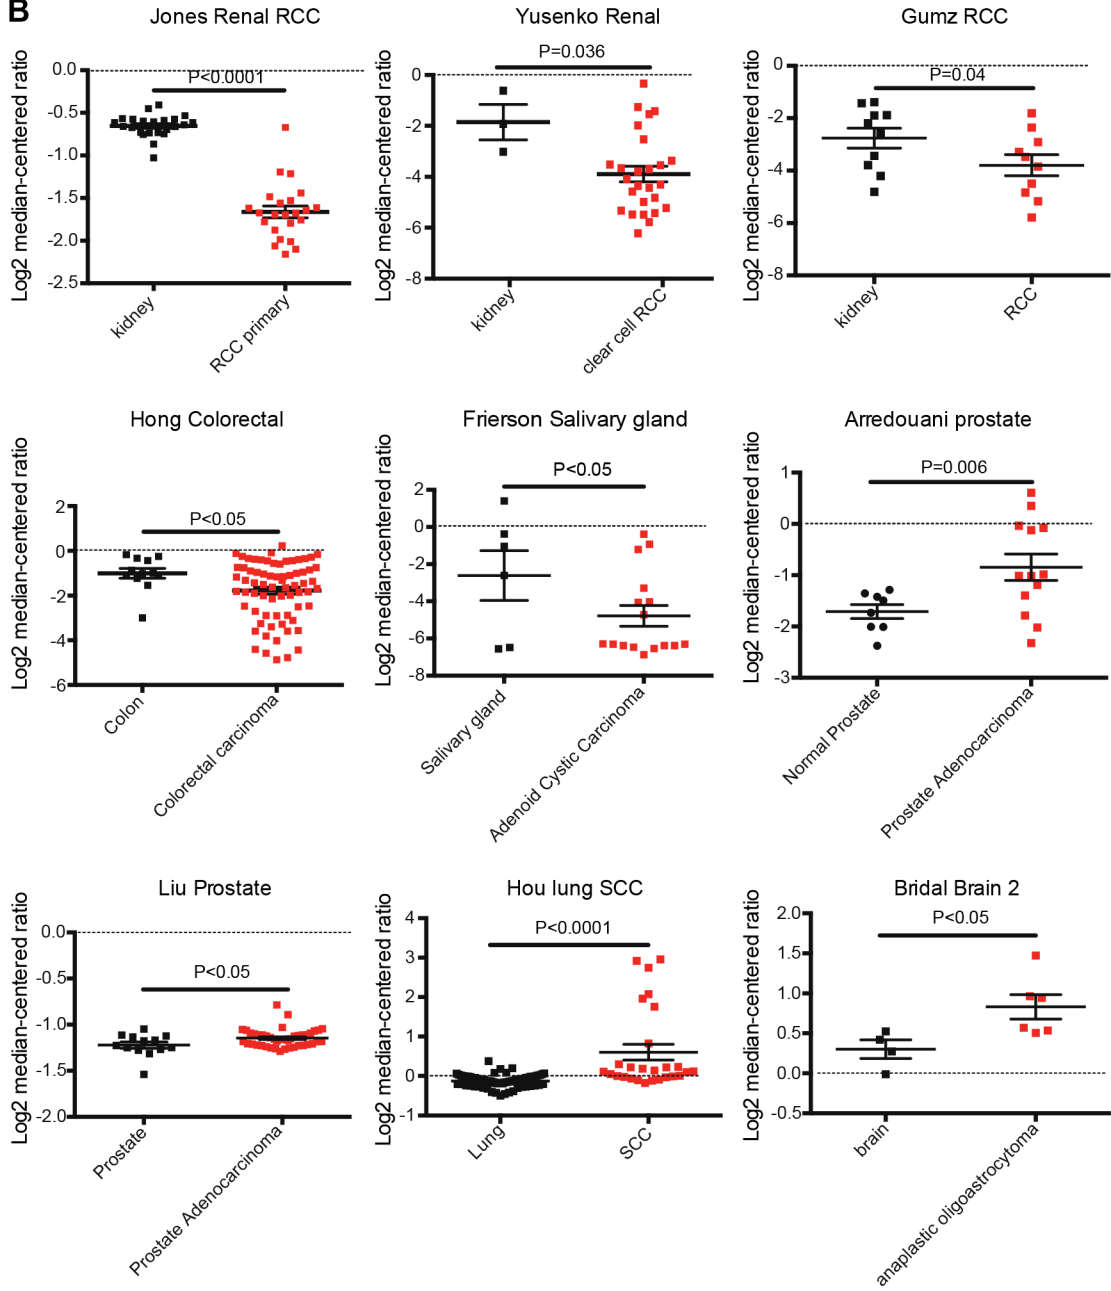

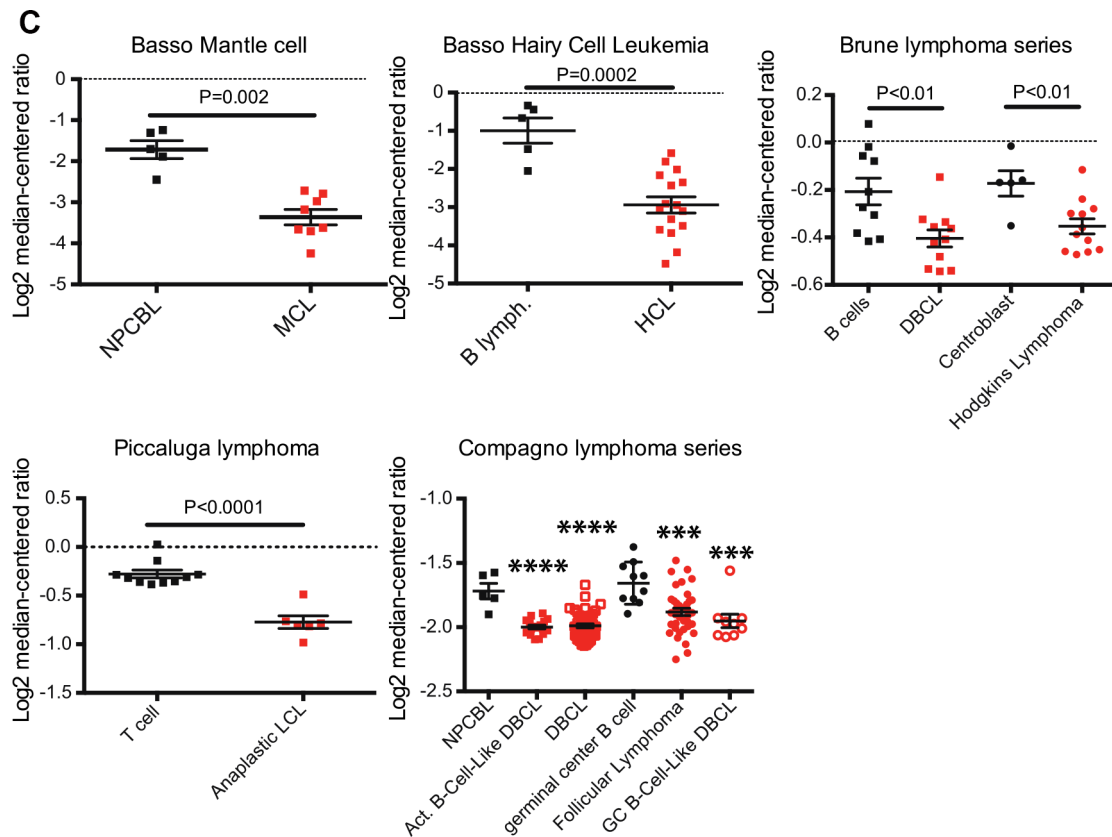

**Supplementary Figure S1: sAC mRNA expression is decreased in human cancers as compared to normal controls.**

(A) Scatter plots of ADCY10 mRNA expression (represented as Log<sub>2</sub> median centered ratio) in normal controls (black symbols) and associated tumors (red symbols). Data is derived from Oncomine as described in the methods. PMM = Pleural Malignant Mesothelioma. Embry. Carcinoma = Embryonal Carcinoma. Bladder cancer = Superficial Bladder Carcinoma. Gastric cancer = Stomach Adenocarcinoma. Gas. Mix. Adenocarc. = Gastric Mixed Adenocarcinoma. Gas. Intest. Type. Adenocarc = Gastric Intestinal Type Adenocarcinoma. Diffuse Gastric Adenocarc. = Diffuse Gastric Adenocarcinoma. BCC = Basal Cell Carcinoma. SCC = Squamous Cell Carcinoma. Melan.=Melanoma. (B) Scatter plots of ADCY10 mRNA expression (represented as Log<sub>2</sub> median centered ratio) in normal controls (black symbols) and associated tumors (red symbols). Data is derived from Oncomine as described in the methods. RCC = Renal Cell Carcinoma. SCC = Squamous Cell Carcinoma. (C) Scatter plots of ADCY10 mRNA expression (represented as Log<sub>2</sub> median centered ratio) in normal controls (black symbols) and associated tumors (red symbols). Data is derived from Oncomine as described in the methods. NPCBL = Naive Pregerminal Center B-Lymphocytes. MCL = Mantle Cell Lymphoma. B Lymph.=B Lymphocytes. HCL = Hairy Cell Leukemia. DBCL = Diffuse B Cell Lymphoma. LCL = Large Cell Lymphoma. Act. = Activated. GC = Germinal Center. Error bars represent mean ± s.e.m. Student's *t*-test. *P* values as indicated or \**P* < 0.05, \*\**P* < 0.01, \*\*\**P* < 0.001, \*\*\*\**P* < 0.0001.

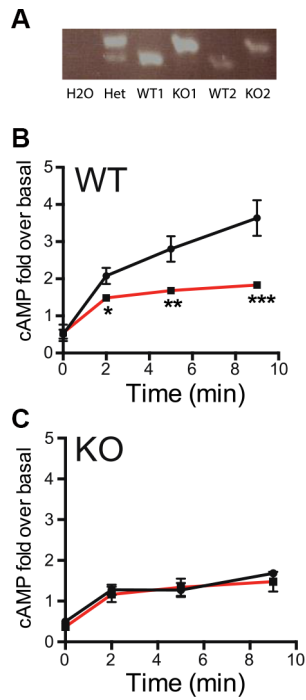

**Supplementary Figure S2: Functional characterization of sAC KO cells.** (A) To confirm the genotype of the primary fibroblasts we performed PCR as previously described (Hess et al., 2014). (B–C), Wild type cells (B) led to more cAMP accumulation over time as compared to sAC KO cells (C) and only wild type cells were sensitive to the sAC-specific inhibitor KH7 (50  $\mu$ M, red lines) as compared to DMSO control (black lines). cAMP accumulation was performed as previously described (see supplemental reference 1).

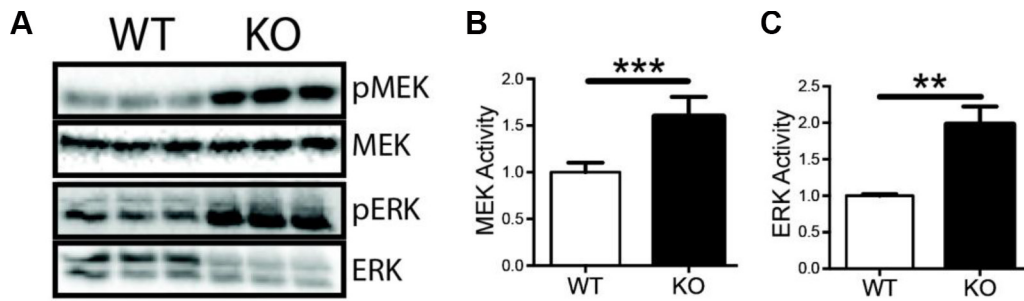

**Supplementary Figure S3: Loss of sAC activity leads to MAPK pathway activation in a cAMP-dependent manner.** MAPK activity in SV40 MEF cells grown in the presence of serum. (A) Western blot and (B–C) quantitation (normalized to WT) of (B) pMEK/MEK (MEK Activity, 43 kDa) and (C) pERK/ERK (ERK Activity, 44/42 kDa) in SV40 WT (white bars) and SV40 sAC KO (black bars) For A–C,  $N = 3$ . (B–C) Student's  $t$ -test, error  $\pm$  SEM. \*\* $P < 0.01$ , \*\*\* $P < 0.001$ .

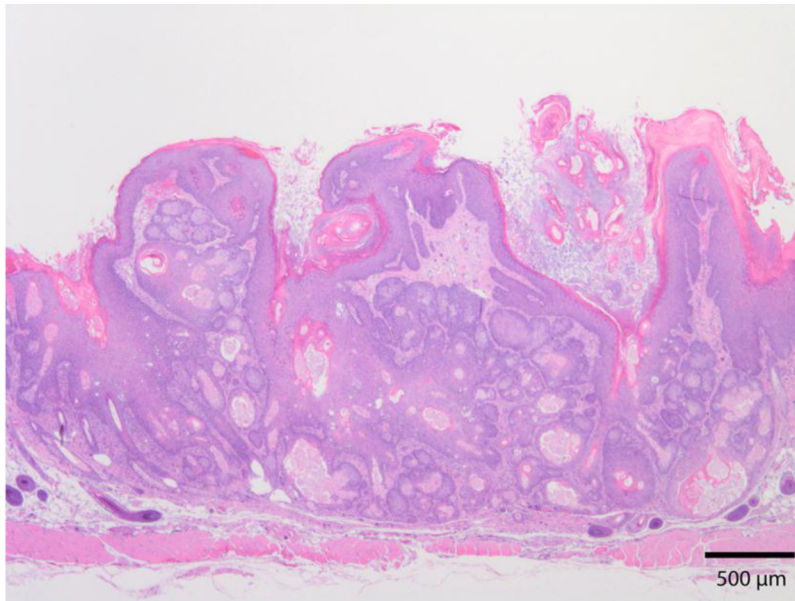

**Supplementary Figure S4: Squamous cell carcinoma in wild type mice.** Hematoxylin and eosin stained section of a representative example of a squamous cell carcinoma (SCC) from a wild type mouse following DMBA/TPA treatment. Image demonstrates full thickness epidermal atypia.

**Supplementary Table S1: Histologic evaluation of DMBA/TPA-induced tumors in wild type and sAC KO mice**

| Mouse ID | genotype | Sex | Weight (g) | Mass # | Histologic diagnosis of skin mass |
|----------|----------|-----|------------|--------|-----------------------------------|
| 973      | WT       | F   | 22.9       | 1      | SCC                               |
|          |          |     |            | 2      | no histo performed                |
| 977      | WT       | F   | 22         | 1      | no histo performed                |
|          |          |     |            | 2      | papilloma                         |
| 980      | WT       | F   | 22         | 1      | no histo performed                |
|          |          |     |            | 2      | no histo performed                |
|          |          |     |            | 3      | papilloma                         |
|          |          |     |            | 4      | papilloma                         |
|          |          |     |            | 5      | no histo performed                |
| 999      | WT       | F   | 21.1       | 1      | papilloma                         |
| 2286     | KO       | M   | 25.96      | 1      | papilloma                         |
|          |          |     |            | 2      | papilloma                         |
|          |          |     |            | 3      | papilloma                         |
|          |          |     |            | 4      | papilloma                         |
|          |          |     |            | 5      | papilloma                         |
|          |          |     |            | 6      | papilloma                         |
|          |          |     |            | 7      | papilloma                         |
|          |          |     |            | 8      | papilloma                         |
|          |          |     |            | 9      | papilloma                         |
|          |          |     |            | 10     | papilloma                         |
|          |          |     |            | 11     | papilloma                         |
|          |          |     |            | 12     | papilloma                         |
|          |          |     |            | 13     | papilloma                         |

|      |    |   |       |    |                                        |
|------|----|---|-------|----|----------------------------------------|
|      |    |   |       | 14 | papilloma                              |
|      |    |   |       | 15 | papilloma                              |
|      |    |   |       | 16 | papilloma                              |
|      |    |   |       | 17 | papilloma                              |
| 1614 | KO | F | 22.37 | 1  | SCC                                    |
|      |    |   |       | 2  | SCC                                    |
|      |    |   |       | 3  | papilloma                              |
| 1301 | KO | F | 22.45 | 1  | papilloma                              |
|      |    |   |       | 2  | papilloma                              |
|      |    |   |       | 3  | papilloma                              |
|      |    |   |       | 4  | no histo performed                     |
| 2280 | KO | F | 22.84 | 1  | SCC                                    |
| 2289 | KO | F | 22.19 | 1  | SCC                                    |
|      |    |   |       | 2  | papilloma                              |
| 958  | WT | F | 20.62 | 1  | papilloma                              |
|      |    |   |       | 2  | papilloma                              |
| 970  | WT | F | 21.33 | 1  | papilloma                              |
| 971  | WT | F | 21.72 | 1  | Benign Sebaceous tumor (seboacanthoma) |
|      |    |   |       | 2  | Benign Sebaceous tumor                 |
|      |    |   |       | 3  | papilloma                              |
|      |    |   |       | 4  | SCC                                    |
| 948  | WT | M | 28.03 | 1  | papilloma                              |
|      |    |   |       | 2  | papilloma                              |
| 2277 | KO | M | 24.68 | 1  | papilloma                              |
|      |    |   |       | 2  | SCC                                    |
|      |    |   |       | 3  | papilloma                              |
|      |    |   |       | 4  | papilloma                              |
|      |    |   |       | 5  | papilloma                              |
|      |    |   |       | 6  | papilloma                              |
|      |    |   |       | 7  | papilloma                              |
|      |    |   |       | 8  | papilloma                              |
| 2285 | KO | M | 26.05 | 1  | papilloma                              |
|      |    |   |       | 2  | SCC                                    |
|      |    |   |       | 3  | papilloma                              |
|      |    |   |       | 4  | papilloma                              |
|      |    |   |       | 5  | SCC                                    |
|      |    |   |       | 6  | SCC                                    |
| 2283 | KO | M | 26.59 | 1  | papilloma                              |
|      |    |   |       | 2  | SCC                                    |
|      |    |   |       | 3  | papilloma                              |
|      |    |   |       | 4  | papilloma                              |
|      |    |   |       | 5  | papilloma                              |
| 2310 | KO | M | 25.49 | 1  | papilloma                              |
|      |    |   |       | 2  | papilloma                              |
|      |    |   |       | 3  | papilloma                              |
| 2278 | KO | M | 24.64 | 1  | papilloma                              |
|      |    |   |       | 2  | Mastocytoma                            |

|      |    |   |       |   |                                        |
|------|----|---|-------|---|----------------------------------------|
|      |    |   |       | 3 | papilloma                              |
| 927  | WT | M | 28.24 | 1 | papilloma                              |
| 2311 | KO | F | 24.48 | 1 | papilloma                              |
|      |    |   |       | 2 | papilloma                              |
|      |    |   |       | 3 | papilloma                              |
| 942  | WT | M | 29.02 | 0 |                                        |
| 947  | WT | M | 27.68 | 0 |                                        |
| 953  | WT | M | 25.55 | 0 |                                        |
| 2298 | KO | F | 22.09 | 1 | SCC                                    |
| 2297 | KO | F | 23.31 | 1 | SCC                                    |
| 2317 | KO | F | 23.68 | 1 | Benign Sebaceous tumor (seboacanthoma) |
| 914  | WT | M | 29.8  | 0 |                                        |
| 915  | WT | M | 29.36 | 0 |                                        |
| 934  | WT | M | 29.83 | 0 |                                        |
| 2294 | KO | M | 24.89 | 0 |                                        |

## REFERENCES

1. J. L. Bitterman, L. Ramos-Espiritu, A. Diaz, L. R. Levin, J. Buck, Pharmacological distinction between soluble and transmembrane adenylyl cyclases. *The Journal of pharmacology and experimental therapeutics*. 2013; 347:589–598.
